1                   **Colicin E1 Fragments Potentiate Antibiotics by**  
2                                                           **Plugging TolC**

3  
4           S. Jimmy Budiardjo<sup>a</sup>, Jacqueline J. Deay<sup>b</sup>, Anna L. Calkins<sup>c</sup>, Virangika K. Wimalasena<sup>b</sup>,  
5                                   Daniel Montezano<sup>b</sup>, Julie S. Biteen<sup>c</sup> and Joanna S.G. Slusky<sup>a,b,1</sup>

6  
7                   <sup>a</sup>Center for Computational Biology, The University of Kansas, 2030 Becker Dr.,  
8           Lawrence, KS 66045-7534 <sup>b</sup>Department of Molecular Biosciences, The University of  
9           Kansas, 1200 Sunnyside Ave. Lawrence KS 66045 <sup>c</sup>Department of Chemistry,  
10                                   University of Michigan, Ann Arbor MI 48109-1055

11  
12  
13  
14  
15           <sup>1</sup>To whom correspondence may be addressed. E-mail: [slusky@ku.edu](mailto:slusky@ku.edu) 785-864-6519  
16

## 17 **Abstract**

18           The double membrane architecture of Gram-negative bacteria forms a barrier  
19 that is effectively impermeable to extracellular threats. Accordingly, researchers have  
20 shown increasing interest in developing antibiotics that target the accessible, surface-  
21 exposed proteins embedded in the outer membrane. TolC forms the outer membrane  
22 channel of an antibiotic efflux pump in *Escherichia coli*. Drawing from prior observations  
23 that colicin E1, a toxin produced by and lethal to *E. coli*, can bind to the TolC channel,  
24 we investigate the capacity of colicin E1 fragments to ‘plug’ TolC and inhibit its efflux  
25 function. First, using single-molecule fluorescence, we show that colicin E1 fragments  
26 that do not include the cytotoxic domain localize at the cell surface. Next, using real-time  
27 efflux measurements and minimum inhibitory concentration assays, we show that  
28 exposure of wild-type *E. coli* to fragments of colicin E1 indeed disrupts TolC efflux and  
29 heightens bacterial susceptibility to four common classes of antibiotics. This work  
30 demonstrates that extracellular plugging of outer membrane transporters can serve as a  
31 novel method to increase antibiotic susceptibility. In addition to the utility of these protein  
32 fragments as starting points for the development of novel antibiotic potentiators, the  
33 variety of outer membrane protein colicin binding partners provides an array of options  
34 that would allow our method to be used to inhibit other outer membrane protein  
35 functions.

36

## 37 **Significance**

38           We find that fragments of a protein natively involved in intraspecies bacterial  
39 warfare can be exploited to plug the *E. coli* outer membrane antibiotic efflux machinery.  
40 This plugging disables a primary form of antibiotic resistance. Given the diversity of  
41 bacterial species of similar bacterial warfare protein targets, we anticipate that this

42 method of plugging is generalizable to disabling the antibiotic efflux of other  
43 proteobacteria. Moreover, given the diversity of the targets of bacterial warfare proteins,  
44 this method could be used for disabling the function of a wide variety of other bacterial  
45 outer membrane proteins.

46

## 47 **Introduction**

48 In Gram-negative bacteria, the concentric structures of the outer membrane, cell  
49 wall, and cytoplasmic membrane protect the cell from extracellular threats. Of these  
50 protective structures, the outer membrane is a particularly formidable barrier (1), owing  
51 to the impermeable structure of the lipopolysaccharide (LPS) that constitutes the outer  
52 membrane's outer leaflet (2). The primary means by which external molecules can gain  
53 access to the cell is through the ~100 varieties of barrel-shaped proteins that are  
54 embedded in each bacterium's outer membrane (outer membrane proteins, OMPs) (3),  
55 and whose diverse functions include the transport of molecules across the membrane—  
56 specifically, the import of nutrients and metabolites and the export of toxins and waste.

57 Because they are accessible from outside the cell, OMPs are attractive targets for  
58 the development of novel antibiotics, and research in this vein has begun to reveal the  
59 therapeutic potential of interfering with OMP structure and function. One recent study in  
60 *Escherichia coli*, for example, showed that exposing bacteria to a monoclonal antibody  
61 that inhibits OMP folding produces bactericidal effects (4). An alternative approach for  
62 targeting OMPs is the development of molecular plugs that block the pores of these  
63 proteins: such a plug would allow for the manipulation of bacterial transport, providing a  
64 means of either starving the bacterium (by preventing the influx of valuable nutrients) or  
65 poisoning it (by preventing the outflow of toxins). This idea of blocking the channel of  
66 outer membrane efflux pumps has been previously proposed for increasing bacterial

67 susceptibility to antibiotics (5). However, no successful examples to date have been  
68 reported.

69 In this study, we find that fragments of colicin E1—a bactericidal toxin produced by  
70 and lethal to *E. coli*—can block the capacity of TolC, an OMP in *E. coli*, to eliminate  
71 antibiotics.

72 TolC is the outer membrane component of the acridine efflux pump (along with AcrA  
73 in the periplasm and AcrB in the inner membrane) (6), which extrudes multiple classes of  
74 antibiotics such as erythromycin, chloramphenicol, tetracycline, doxorubicin, and  
75 acriflavine (7, 8), as well as other compounds such as bile salts and detergents (9).  
76 Deletion of TolC has been shown to render *E. coli* vulnerable to a wide variety of  
77 antibiotics (10). Moreover, expression of TolC is linearly correlated to antibiotic  
78 resistance in clinical isolates of *E. coli* (11). These observations suggest that identifying  
79 means of targeting TolC might provide insights that can contribute towards disabling  
80 antibiotic resistance, which is becoming a world-wide threat (12, 13).

81 Colicins are *E. coli*-specific bacteriocins, which are protein toxin systems through  
82 which bacteria engage in 'bacterial warfare' with other, similar bacteria. Bacteriocins  
83 hijack the OMPs of a target bacterium to cross its impermeable outer membrane and kill  
84 the bacterium. *E. coli* produces numerous types of colicins, which vary in their receptor  
85 targets and killing mechanisms. Yet, all colicins share a common triadic domain  
86 architecture, comprising the following components: (i) an N-terminal translocation (T)  
87 domain, (ii) a receptor-binding (R) domain, and (iii) a C-terminal cytotoxic (C) domain  
88 (Fig. 1A). Colicin import is initialized by the binding of the R domain to an OMP target  
89 with high affinity (14, 15); this binding localizes the colicin onto the outer membrane.  
90 Once colicin is tethered to the outer membrane surface, the T domain initiates  
91 translocation using a secondary OMP receptor that is, in most cases, distinct from the R

92 domain's OMP target (16). Colicin E1 uses TolC as the receptor of the T domain and  
93 BtuB as the receptor of the R domain (17).

94 Prior studies have suggested that segments of colicin E1's T domain can bind the  
95 TolC channel (18). In particular, peptides including residues 100-120 of colicin E1  
96 (termed the 'TolC box'), with additional amino acids at the C-terminus of the 'box', have  
97 been shown to co-elute with TolC (18) and to disrupt channel conductance (19). A  
98 subsequent study confirmed the identity of the minimal T-domain segment that binds  
99 TolC, showing that *E. coli* exposure to peptides comprising residues 100–120 is  
100 sufficient to prevent subsequent binding of full-length colicin E1 (as reflected in the fact  
101 that the bacteria were protected from the colicin's cytotoxic effects (20)). Notably, none  
102 of these studies investigated the effects of exposure to colicin E1 fragments on TolC's  
103 efflux activity.

104 Accordingly, here we use specific fragments of colicin E1 to determine whether the  
105 binding event between the N-terminal T domain and the TolC pore can disrupt the  
106 OMP's native export function. In particular, we suggest that this binding event is likely to  
107 plug the pore, in light of observations, obtained through circular dichroism, that colicin E1  
108 inserts into the TolC  $\beta$ -barrel as a helical hairpin (18). The proposed plugging  
109 mechanism is further supported by co-crystal structures of colicin E3 and E9 fragments  
110 bound to the outer membrane porin OmpF, which revealed that the peptides obstruct the  
111 OmpF barrel (21, 22).

112 We investigate minimal truncations of colicin E1 that include the entirety of the T and  
113 R domains (colE1-TR), the T domain alone (colE1-T), and a peptide containing residues  
114 100-143 (colE1-T<sub>100-143</sub>), i.e., the TolC box together with 23 additional residues (Fig. 1B).  
115 Inclusion of the additional residues in the latter peptide was motivated by the observation  
116 that colE1-T forms a helical hairpin and that colicin E1 is theorized to also insert into  
117 TolC as a helical hairpin (23), and a transmembrane hairpin requires ~43 amino acids.

118 Through real-time efflux assays,  
 119 minimum inhibitory concentration (MIC)  
 120 experiments, and single-molecule  
 121 microscopy, we find that colE1-TR and  
 122 colE1-T are able to inhibit TolC-  
 123 mediated efflux. Importantly, we find that  
 124 extracellular plugging of TolC reduces  
 125 the amount of antibiotics required to  
 126 inhibit the growth of these bacteria—  
 127 indicating that this colicin E1 fragment  
 128 reduces the antibiotic resistance  
 129 conferred by TolC. This work points to  
 130 the potential for using colicin fragments  
 131 for bacterial species-specific antibiotic  
 132 potentiation and, more broadly, for  
 133 species-specific blocking of the  
 134 import/export functions of OMPs.

135 **Results**

136 **Colicin E1 Localization.** To determine  
 137 the utility of our colicin E1 truncations as  
 138 plugs for antibiotic efflux, we used an  
 139 extracellular protease digestion assay to  
 140 assess whether colE1-T and colE1-TR  
 141 localize on the cell surface or  
 142 translocate across the outer membrane. Stalling on the outer membrane surface would

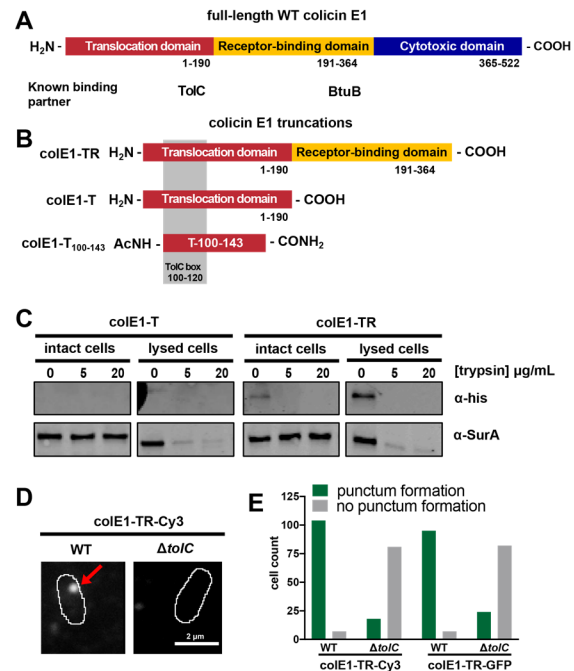

**Fig. 1: Colicin E1 domains and cellular localization.** Domain architecture of colicin E1. (A) Full-length colicin E1, showing sections known to bind to OMP targets. The T domain (blue) interacts with TolC; the R domain (yellow) interacts with BtuB; and the C domain is delivered to the inner membrane. (B) Truncation constructs used in this study to evaluate TolC plugging. colE1-TR lacks the C-terminal cytotoxic domain; colE1-T lacks both the cytotoxic and R domains; and colE1-T<sub>100-143</sub> includes the TolC box, a stretch of amino acids (residues 100-120) required for binding to TolC (grey box). (C) Extracellular protease digest assay. SurA used as a periplasmic localization and membrane integrity control (D) Fluorescence image of Cy3-labeled colE1-TR overlaid on outlines of living *E. coli* cells from phase-contrast microscopy for WT and  $\Delta tolC$ . Red arrow indicates a punctum of 12-20 colE1-TR molecules on the cell surface. Scale bar: 2  $\mu$ m. (E) Counts of cells where colE1-TR-Cy3 punctum formation was observed for WT and  $\Delta tolC$ .

143 render the proteins susceptible to digestion when trypsin is in the extracellular  
144 environment. Conversely, if the protein translocates into the intracellular environment,  
145 the outer membrane should shield the protein from digestion.

146 Colicin localization was probed through western blot analysis of specific colicin  
147 fragments with C-terminal polyhistidine-tags. Cells were incubated with these colicin  
148 fragments and subsequently exposed to two increasing concentrations of trypsin. If the  
149 protein enters the cell, the outer membrane shields it from trypsin digestion and a  
150 corresponding band is present on the western blot under conditions with trypsin (intact  
151 cell condition). Periplasmic protein SurA was used as a membrane integrity control to  
152 identify if trypsin entered cells. As a trypsin activity control, half of the cell sample was  
153 lysed (lysed cell condition) exposing all cellular compartments to trypsin.

154 When we probed colE1-T for interaction with the cell, there was no detectable  
155 level of the protein either in the presence or in the absence of trypsin (Fig. 1C, left),  
156 indicating lack of binding. When cells were incubated with colE1-TR, a band  
157 corresponding to colE1-TR appeared on intact cells that were not exposed to trypsin.  
158 When we increased the amount of trypsin, colE1-TR was digested at each trypsin  
159 concentration, indicating that the colicin E1 fragment was localized to the outer  
160 membrane surface (Fig. 1C, right). In contrast, the control, periplasmic chaperone SurA,  
161 was not degraded at any trypsin concentration unless the cells were lysed before the  
162 digestion reaction (24).

163 After determining that colE1-TR remains at the cell surface, we probed binding  
164 and cell localization through single-molecule fluorescence microscopy. C-terminal  
165 cysteines were incorporated into colE1-T and colE1-TR to enable thiol coupling to the  
166 fluorescent dye cyanine 3 (Cy3). When colE1-TR-Cy3 was added to the extracellular  
167 environment of WT BW25113 *E. coli* cells (containing TolC), distinct puncta (Fig. 1D,  
168 left) formed on 94% of the cells ( $n = 111$ ) (Fig. 1E). In strain JW5503-1, a population of

169 cells lacking TolC ( $\Delta tolC$ ), puncta were observed in only 18% of cells ( $n = 99$ ) (Fig. 1D,  
170 right, Fig. 1E). In WT and  $\Delta tolC$  cells that did feature puncta, colE1-TR formed clusters  
171 of 12–20 molecules per punctum, where each cluster had a diameter of less than the  
172 microscope's 0.5  $\mu\text{m}$  resolution. The quantity of molecules and the size of the puncta  
173 were in agreement with previous studies of BtuB clusters (25, 26), supporting the  
174 assumption that the puncta comprised clusters of colE1-TR bound to BtuB. We further  
175 verified that punctum formation and localization was not an artifact of Cy3 conjugation: a  
176 fusion construct of GFP to the C-terminus of colE1-TR also displayed the same cluster  
177 formation characteristics (Fig. 1E, *SI Appendix*, Fig. S1A). No other single protein  
178 binding events were detected aside from the observed puncta formation in either WT or  
179  $\Delta tolC$  cells. A  $\Delta btuB$  strain is not commercially available. Both strains of the Keio  
180 collection marked  $\Delta btuB$  were found to have reverted by the Coli Genetic Stock Center  
181 (personal communication). Although there have been truncations described in the  
182 literature, we anticipate that at least some of the protein is required for survival.

183 Colicin constructs lacking the R domain (colE1-T-Cy3) showed no detectable  
184 binding either to WT cells containing TolC or to the TolC knockout strain of cells (*SI*  
185 *Appendix*, Fig. S1B), indicating that the TolC:colE1-T interaction is much weaker than  
186 the BtuB:colE1-TR interaction. Moreover, when we observed time courses of bound  
187 colE1-TR, all puncta remained immobile for > 5 minutes (Movie S1), further supporting  
188 the proposition that colE1-TR does not translocate (27) and that it binds to BtuB. Limited  
189 mobility of BtuB in the membrane has previously been observed; specifically,  
190 fluorescently-labeled BtuB did not show fluorescence recovery after photobleaching  
191 (FRAP) on long time scales (28).

192 Taken together, our observations are consistent with a model in which colicin E1  
193 initially binds to BtuB, and in which TolC subsequently improves the interaction, and thus  
194 increases the frequency of cluster formation. Because the T-domain did not show any



195 binding in either localization experiment, we did not test the TolC box containing peptide  
196 colE1-T<sub>100-143</sub>.  
197  
198 **Colicin E1 Binding to TolC.** Since binding of colE1-T to TolC was not detectable in our  
199 cell-based experiments, we wanted to ensure that our colicin E1 constructs indeed bind  
200 to TolC *in vitro*. The interaction of TolC and colicin E1 fragments has previously been  
201 characterized *in vitro* through co-elution of the peptides by size exclusion chromatograph  
202 (SEC) (18). We used a similar approach and assessed peak shifts for both colE1-T and  
203 colE1-TR when mixed with TolC. ColE1-T alone and TolC alone eluted from the SEC at  
204 14.7 mL and 10.7 mL, respectively (Fig. 2A, right). When the two were mixed together,  
205 we observed shift in the TolC peak to 10.2 mL and a decrease in intensity associated  
206 with the colE1-T peak indicating that a subset of the population has migrated with TolC.  
207 We analyzed the peak (arrow) using sodium dodecyl sulfate polyacrylamide gel  
208 electrophoresis (SDS-PAGE) (Fig. 2A, left) and found the presence of both colE1-T (red  
209 triangle) and TolC (purple triangle), indicating the colE1-T co-elutes with TolC. ColE1-TR

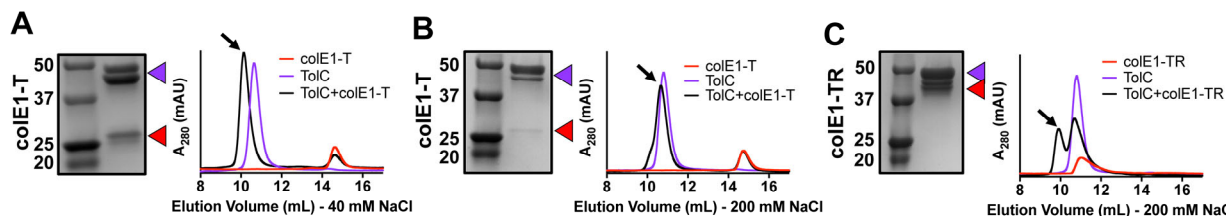

**Fig. 2: Colicin E1 fragments bind to TolC *in vitro*.** Co-elution experiment to determine binding of colE1-T (red line) and colE1-TR (red line) to TolC (purple line). The arrow indicates the co-elution (black line) fractions that were analyzed by SDS-PAGE. TolC runs as a double band at ~50kDa as a monomer. Red arrows indicate the presence of colicin E1 constructs that have co-eluted with TolC (purple arrows). (A) Co-elution of colE1-T with TolC at 40mM NaCl (B) Co-elution of colE1-T with TolC at 200mM NaCl (C) Co-elution of colE1-TR with TolC at 200mM NaCl. The T domain did not show binding in our *in vivo* experiments but binds to TolC *in vitro*. colicinE1-TR precipitates in 40mM NaCl so it could not be evaluated for binding with TolC under these conditions.

210 precipitates in the NaCl concentration (40 mM) used to co-elute colE1-T so we increased

211 the salt concentration to 200 mM. Under the higher salt concentration, when TolC and  
212 colE1-T are mixed there is a smaller peak shift and the presence of a shoulder (Fig. 2B,  
213 right). Although we could detect binding, the higher salt concentration prevents full  
214 binding as indicated by a much fainter band for colE1-T (Fig. 2B, left).

215 When TolC and colE1-TR were mixed (Fig. 2C, right), we observed a peak shift  
216 from 11.0 mL for colE1-TR alone to 10.0 mL for colE1-TR in the presence of TolC. The  
217 more drastic shift (as compared with the shift observed for colE1-T) can be attributed to  
218 the additional mass associated with the R domain. Again, analysis with SDS-PAGE (Fig.  
219 2C, left) revealed that both colE1-TR (red) and TolC (purple triangle) bands were  
220 present.

221

222 **Colicin E1 Inhibits Active Efflux.** Real-time efflux inhibition by colicin E1 fragments  
223 was assessed using a live-cell assay with N-(2-naphthyl)-1-naphthylamine (NNN)-dye,  
224 which is effluxed by the acridine efflux pump and fluoresces when it is localized inside  
225 the cell (29). Efflux of NNN can be turned off by the protonophore CCCP, which  
226 neutralizes the proton motive force allowing for accumulation of the dye within the cell.  
227 Active efflux can then be monitored by the decay in fluorescent signal once proton  
228 motive force is reenergized by the addition of glucose (29-33).

229 We assessed the ability of colicin E1 truncations to plug TolC by monitoring real-  
230 time efflux of NNN. Cells exposed to colE1-T<sub>100-143</sub> (comprising colicin E1 residues 100-  
231 143; Fig. 1B) did not show lower real-time efflux of the fluorescent probe molecule NNN  
232 (i.e., weaker decay in fluorescence), as compared with untreated cells (Fig. 3A). This  
233 observation is notable in light of the fact that, in previous studies, similar peptides were  
234 shown to bind TolC (18, 20) and to occlude the channel, as reflected in diminished

235 conductance (18, 19). These  
236 studies, however, did not  
237 investigate the effects of colicin E1  
238 fragments on the efflux function of  
239 the pump.

240 Cells exposed to colE1-T,  
241 comprising the full T domain, did  
242 show a distinctly lower decay in  
243 final fluorescence compared with  
244 untreated cells, though the treated  
245 cells did not retain their baseline  
246 fluorescence. These results  
247 indicate that colE1-T partially  
248 inhibited efflux (Fig. 3B). Finally,  
249 exposure to colE1-TR produced  
250 full inhibition of the acridine efflux  
251 pump, as fluorescence did not  
252 decrease after the addition of  
253 glucose (Fig. 3C).

254 **Colicin E1 Increases *E. coli* Susceptibility to Antibiotics.** Because exposure of cells  
255 to colE1-TR completely inhibited NNN efflux, we evaluated the capacity of this colicin E1  
256 truncation to potentiate antibiotics through MICs. An effective TolC plug will reduce the  
257 concentration required to inhibit growth as antibiotics remain trapped within the cell. We  
258 chose representative antibiotics from four different antibiotic classes that are known TolC  
259 substrates: kanamycin, ciprofloxacin, erythromycin, and the antimicrobial agent  
260 benzalkonium chloride (corresponding to the classes aminoglycosides, fluoroquinolones,

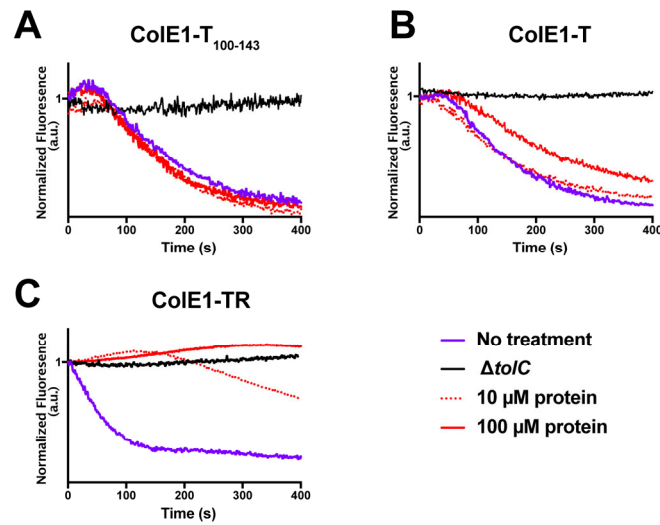

**Fig. 3: Colicin E1 fragments inhibit active efflux.** Effect of colicin E1 fragments on real-time efflux of N-(2-naphthyl)-1-naphthylamine (NNN) in *E. coli* WT and  $\Delta tolC$ : (A) An N-terminal peptide fragment composed of residues 100-143 encompassing the “TolC box” (B) The entirety of colE1-T domain (C) The entirety of the T and R domains. In each case, fluorescence in WT *E. coli* with no protein is represented by a green line;  $\Delta tolC$  is represented by a black line; WT + 10  $\mu$ M protein is represented by purple dots; WT + 100  $\mu$ M protein is represented by purple lines. The TolC box peptide does not show activity against NNN efflux. ColE1-T moderately inhibits NNN efflux at 100  $\mu$ M. ColE1-TR shows partial inhibition at 10  $\mu$ M and full inhibition at 100  $\mu$ M.

261 macrolides, and quaternary ammonium  
 262 compounds, respectively). Specifically,  
 263 WT *E. coli* cells that were exposed to  
 264 100  $\mu$ M colE1-TR in combination with  
 265 each of these antibiotic substances  
 266 showed substantially lower MICs (Fig. 4)  
 267 compared with cells exposed to the  
 268 antibiotics alone: Exposure to 100  $\mu$ M  
 269 colE1-TR made WT *E. coli* ~1.5-2.0-fold  
 270 more susceptible to these antibiotics (SI  
 271 Appendix, Table S1).

272

## 273 Discussion

274 In this study, we explored a  
 275 novel method of modulating OMP  
 276 function in *E. coli* by plugging an outer  
 277 membrane protein channel using a  
 278 fragment of a protein that is produced by  
 279 and lethal to these bacteria. Specifically,  
 280 we leveraged the observed capacity of  
 281 colicin E1's T domain to occlude TolC,  
 282 and proposed that the colicin might also  
 283 serve as a molecular plug that disrupts the channel's native efflux function, which  
 284 facilitates the elimination of antibiotics. We found that a fragment of colicin E1 that lacks

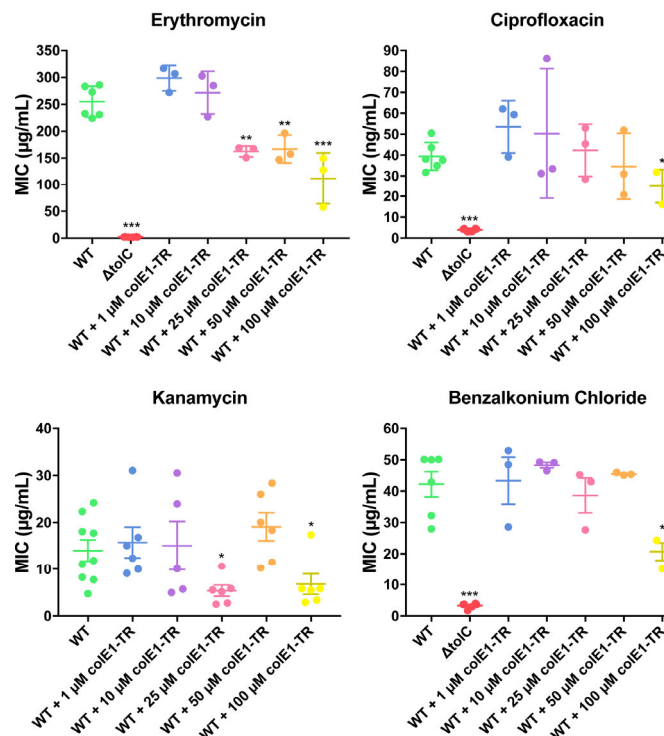

**Fig. 4: ColE1-TR makes antibiotics more potent:** Antibiotic susceptibility was determined in the absence (green) and presence of colE1-TR at 1  $\mu$ M (blue), 10  $\mu$ M (purple), 25  $\mu$ M (pink), 50  $\mu$ M (orange), 100  $\mu$ M (yellow) for erythromycin, ciprofloxacin, kanamycin, and benzalkonium chloride in *E. coli* WT. MICs for  $\Delta tolC$  (red) are included as a reference for total loss of TolC. For kanamycin, the MIC for  $\Delta tolC$  was not determined since the deletion of the *tolC* gene is accomplished by insertion of a kanamycin resistance cassette. Kanamycin was collected with more replicates as the data was more variable. All data for WT were collected with biological replicates, and error bars correspond to the standard error of the mean. Clusters indicated have a statistically significant difference in their mean values relative to WT (\* with  $P < .050$ , \*\* with  $P < .010$ , \*\*\* with  $P < .001$ )

285 the cytotoxic C domain potentiates antibiotics of various classes, including  
286 aminoglycosides, fluoroquinolones, macrolides, and quaternary ammonium compounds.

287 We first showed that colicin E1 truncations composed of the T or the TR  
288 domains, without the C domain, do not fully enter into cells. Through single-molecule  
289 microscopy we were able to observe the TR domain bind to the WT cell surface. In  
290 contrast, for colE1-T, a truncation that did not include the R domain, we did not observe  
291 binding to the cell surface. Notably, however, TolC binding did seem to have a significant  
292 role in the binding of colE1-TR to the cell surface: binding occurred in a substantially  
293 higher proportion of WT *E. coli* than in cells deleted of TolC. In  $\Delta tolC$  cells, the few  
294 binding events that were observed were localized to puncta, and were assumed to  
295 reflect binding of the R domain to BtuB. Taken together, these observations suggest that  
296 the T domain:TolC interaction enhances colicin E1's ability to stay bound to the surface  
297 but is not sufficient on its own to show binding events. Indeed, this proposition is  
298 supported by the results of the real-time efflux functional assay, where colE1-T only  
299 partially inhibited efflux of antibiotics, whereas colE1-TR achieved full inhibition. We infer  
300 from these observations that the relative affinity of the T domain for TolC is weaker than  
301 the affinity of the R domain to BtuB. Avidity by the additional interaction of the R domain  
302 with BtuB is required for full inhibition of efflux. This is not surprising since colicin E1  
303 functions as part of a mechanism to deliver a cytotoxic domain and not specifically for  
304 TolC plugging.

305 In addition to pointing to a means of manipulating TolC efflux, our observations  
306 enable us to draw conclusions regarding the mechanism of efflux inhibition. Previous  
307 functional studies have proposed two alternative models for colicin E1's utilization of  
308 TolC to enter and poison the cell (18, 34). The first is the 'total thread' model in which the  
309 entire colicin is unfolded, and TolC serves as a channel for it to thread through (34). The  
310 second, 'pillar' model, based on structural studies of the binding interaction between

311 TolC and N-terminal peptides of colicin E1, proposes that colicin E1 inserts into TolC as  
312 a helical hairpin, which serves as a buttress to facilitate the entry of the colicin's cytotoxic  
313 domain (18). In this model, the intrinsic properties of the cytotoxic domain itself are  
314 proposed to allow it to cross the outer membrane, potentially with mediation by anionic  
315 LPS. The results presented herein support the latter model. Specifically, we observed  
316 that, without the cytotoxic domain, colE1-TR remains stalled on the outer membrane  
317 exposed to the extracellular environment, instead of entering the cell, as would be  
318 expected with the total thread model.

319 Accordingly, we propose the following mechanism of efflux inhibition based on  
320 the Cramer 'pillar' model of colicin E1 interaction with BtuB and TolC. First, the R domain  
321 binds to BtuB with high affinity and acts as an anchoring point for the colicin on the cell  
322 membrane (Fig. 5A). Second, the T domain is able to search for TolC and insert into the  
323 channel, stabilizing its association with the membrane and, more importantly, forming a  
324 plug that blocks the  
325 exit of TolC  
326 substrates (Fig. 5B).

327 Since the  
328 presence of TolC  
329 enhances puncta  
330 formation, both  
331 BtuB and TolC need  
332 to be in close  
333 proximity for binding  
334 to occur. Given that

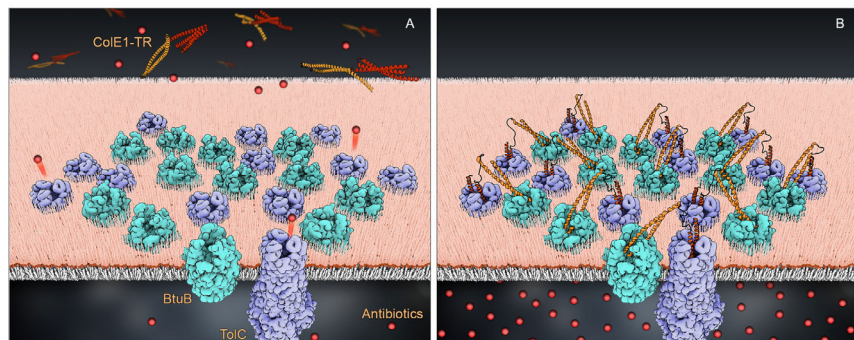

**Fig. 5: Model of colE1-TR inhibition of efflux.** The R domain of colE1-TR (orange) binds to BtuB (cyan) with high affinity and anchors colE1-TR to the surface of the cell. The T domain (red) then inserts into TolC (lavender), plugging the channel and blocking exit of antibiotics (*spheres*). We only see this interaction when 12 or more colE1-TR bind in the same cluster. (A) Before binding, antibiotics are effluxed (B) the pillar model is depicted as a possible binding configuration that prevents efflux.

335 BtuB clusters together—potentially excluding TolC—the number of full binding sites  
336 available for the T and R domains of colicin E1 may be substantially lower than simply



337 the number of TolC or BtuB proteins. In principle, the resolution of our microscopy  
338 experiments can detect single binding events, yet we only observe puncta with 12  
339 binding events or more of colE1-TR to the cell surface. We speculate that there may be  
340 geometric constraints on a cluster. It may be the case that there are not sufficient TolC  
341 and BtuB oriented in such a way that at least 12 ligands can bind to both TolC and BtuB  
342 at once. To understand the order of the geometric constraint, we can create a simple  
343 model of the problem as a six by four grid allowing for 12 TolCs and 12 BtuBs. If each of  
344 these 24 proteins can be placed in any configuration on the grid, this results in the  
345 number of possible configurations at  $24 \text{ choose } 12$  equals 2,704,156 (*SI Appendix*,  
346 methods). The number of configurations in which all 12 TolCs would be adjacent to a  
347 BtuB is a small percentage of these configurations. Using the Hopkraft-Karp algorithm  
348 (*SI Appendix*, methods) we determined how many of these conformations would have all  
349 TolC paired to a BtuB by being in one of BtuB's eight adjacent squares. We find only  
350 262,912 confirmations or 10% of the total possible arrangements-- suggesting that the  
351 availability for binding within a cluster is a low probability event.

352         Though it seems that colicin E1 confers a dose response of antibiotic  
353 potentiation, the relatively high concentration of colE1-TR needed to significantly inhibit  
354 efflux may be at least partially explained by these geometric considerations as well as by  
355 other binding concerns. Although previous studies have identified nanomolar affinities  
356 between BtuB and the R domain of colicin E3 (14, 35), in a competition assay where  
357 excess BtuB was shown to protect cells from colicin E3, no protection from colicin E1  
358 was observed, even at 200 molar excess (36). The latter observation indicates that the  
359 binding affinity between colicin E1 and BtuB is lower than that between colicin E3 and  
360 BtuB, and may reflect the fact that, as observed here, TolC has a significant role in  
361 colicin E1 binding. At an  $OD_{600} = 1$  we anticipate approximately  $8 \times 10^8$  *E. coli* cells, each  
362 with approximately 400 BtuBs (37) and 1,500 trimeric TolCs (38). A back-of-the-

363 envelope calculation indicates that at a 100 $\mu$ M concentration, colE1-TR has 50,000  
364 colE1-TR domains for every TolC pore in the sample. Though 10  $\mu$ M colE1-TR was  
365 sufficient to affect efflux of NNN, this quantity did not stop efflux completely, and was not  
366 sufficient to heighten cells' sensitivity to antibiotics. Though we cannot explain why quite  
367 such a high concentration is necessary for antibiotic potentiation, it is clear that for this  
368 method of antibiotic potentiation to be useful the binding affinity between the T domain  
369 and TolC will need to be increased.

370         Owing to their limited potency, our colE1-T and colE1-TR fragments are not likely  
371 to be useful in direct practical applications of antibiotic potentiation. However, as a proof  
372 of concept, our findings offer a potential roadmap for further development. A more potent  
373 binder of TolC would not need the R domain anchor. If the interaction between TolC and  
374 colE1-T can be resolved to atomic detail, the colicin T domain would serve as an ideal  
375 candidate for optimization by computational methods and/or by directed evolution to  
376 engineer an effective antibiotic potentiator to prevent the spread of antibiotic resistance.  
377 Moreover, once the atomic structure of the interaction is known, proteins could be  
378 designed for blocking efflux through outer membrane efflux pumps of at least five other  
379 bacterial organisms. Each of these organisms have structurally characterized outer  
380 membrane efflux pumps that have been shown to be homologous and structurally similar  
381 to TolC (39).

382         More broadly, there are more than 20 known varieties of bacteriocins. These  
383 bacteriocins are known to bind to different bacterial outer membrane proteins with a wide  
384 variety of functions including: adhesion, iron transport, and general import (16, 40).  
385 Applying this method of inhibition using fragments derived from other colicins may  
386 provide insight into inhibition of other bacterial function as well.

387



## 388 **Materials and Methods**

389 A complete description of materials and methods is available as supporting information.

### 390 *E. coli* strains

391 *E. coli* strains BW25113 and JW5503-1 were purchased from the Coli Genetic Stock

392 Center (CGSC). JW5503-1 is a tolC732(del)::kan from the parent strain BW25113.

393 BL21(DE3) were used for expression of the colicin constructs. BL21(DE3)Omp8 (a

394 generous gift from the D. Müller) was used to express TolC.

395

### 396 Expression and Purification

397 Colicin E1 constructs

398 Genes for colicin constructs (colE1-T, colE1-TR, colE1-T-E192C, colE1-TR-E366C,

399 colE1-TR-GFP) were cloned into pET303. Plasmids were transformed into BL21(DE3)

400 and proteins were expressed in TB media supplemented with 0.4% glycerol, 10 mM

401 MgCl<sub>2</sub>. Protein expression was induced with 1mM IPTG at 15 °C for 24 hours. Proteins

402 were purified by nickel affinity chromatography followed by gel filtration on an ÄKTA pure

403 chromatography system.

404 TolC

405 Full-length TolC was cloned into pTrcHis with a C-terminal 6x histidine tag and

406 transformed into BL21(DE3)Omp8. Protein expression was induced with 1mM IPTG at

407 25 °C for 24hrs. TolC was extracted from the membrane fraction with 1% n-dodecyl-β-D-

408 maltoside at 4 °C for 24hrs and purified by nickel affinity chromatography followed by gel

409 filtration on an ÄKTA pure chromatography system.

410

### 411 Peptide Synthesis

412 ColE1-T<sub>100-143</sub> was synthesized using a CEM liberty blue microwave peptide synthesizer  
413 using standard Fmoc chemistry. The peptides were cleaved using a solution of  
414 92.5:2.5:2.5:2.5 TFA:TIPS:H<sub>2</sub>O:DoDt and the crude peptides were purified using  
415 preparative HPLC. Analytical HPLC traces were acquired using an Agilent 1100  
416 quaternary pump and a Hamilton PRP-1 (polystyrene-divinylbenzene) reverse phase  
417 analytical column (7  $\mu$ m particle size, 4 mm x 25 cm) with UV detection at 215 nm. The  
418 eluents were heated to 45 °C to reduce separation of rotational isomers, and elution was  
419 achieved with gradients of water/ acetonitrile (90:10 to 0:100 containing 0.1% TFA) over  
420 20 min. Low-resolution mass spectra (LRMS) were obtained using a Waters Micromass  
421 ZQ 4000 instrument with ESI+ ionization

422

#### 423 Extracellular Protease Digestion

424 Protein localization after exogenous addition to whole cells was determined as  
425 previously described (24). Briefly, colE1 protein constructs were incubated with whole  
426 cells followed by trypsin digestion. If colE1 enters the cell it would be protected from  
427 trypsin digest by the cell membrane. If colE1 remains localized to the outer membrane it  
428 would be susceptible to trypsin digestion. The presence of ColE1 was probed through  
429 western blot analysis.

430

#### 431 Single-Molecule Microscopy

432 Cysteine mutants were labeled with Cyanine 3 (Cy3) through maleimide chemistry.  
433 BW25113 or  $\Delta toIC$  were mixed with Cy3 labeled colicin E1 (T or TR) or colE1-TR-GFP  
434 and imaged (live and unfixed) using epifluorescence microscopy with sensitivity to detect  
435 single dye molecules as described previously (41). Fluorescence was excited by a 561-  
436 nm laser (Coherent Sapphire 560-50) for Cy3 or a 488-nm laser (Coherent Sapphire  
437 488-50) for GFP. Fluorescence was imaged with an Olympus IX71 inverted microscope

438 with a 100x, 1.40-NA oil-immersion objective. Images were captured with a Photometrics  
439 Evolve electron multiplying charge-coupled device (EMCCD) camera.

440

#### 441 Co-elution

442 The interaction of TolC and colicin E1 T or TR were determined by co-elution on an SEC  
443 column. Purified TolC and colicin E1 T or TR were mixed at a 1:2 molar ratio and  
444 incubated at room temperature for 1 hour before loading onto a Superdex 200 Increase  
445 10/300 GL column (GE Healthcare). The protein was eluted with 1.5 column volumes  
446 into 20 mM Tris pH 8.0, 40 mM NaCl, 0.05% n-dodecyl- $\beta$ -D-maltoside for colE1-T. For  
447 colE1-TR the NaCl concentration was increased to 200 mM to prevent precipitation.  
448 Elution fractions were collected every 0.5 mL. Peak fractions were concentrated to 20  $\mu$ L  
449 and analyzed by SDS-PAGE.

450

#### 451 Real-time Efflux

452 Real-time efflux activity in the presence of colE1-TR was determined as previously  
453 described with some modifications (29, 30). Cells were resuspended to in cold PBS with  
454 and without 10-100  $\mu$ M colicin proteins and incubated for 15 minutes on ice. 100 $\mu$ M  
455 carbonyl cyanide m-chlorophenyl hydrazone (CCCP) was added to turn off efflux. After  
456 an additional 15 minutes the efflux dye NNN was added to the cells to 10  $\mu$ M. The cells  
457 were incubated at 25 °C with shaking at 140 r.p.m. for 2 hours. Cells were harvested at  
458 3,500g for 5 minutes and washed once in 20 mM potassium phosphate buffer pH 7 with  
459 1mM MgCl<sub>2</sub>. Cell were loaded into a quartz cuvette (Agilent Technologies). Fluorescence  
460 was measured with an Agilent Cary Eclipse fluorescence spectrophotometer with  
461 excitation wavelength of 370 nm and emission wavelength of 415 nm. Fluorescence  
462 measurements were taken every 1 second. After 100 seconds, 50 mM glucose was

463 added to re-energize the cells and initiate efflux, and fluorescence data were collected  
464 for an additional 600 seconds.

465

#### 466 MICs

467 MICs were determined using the broth dilution method in 96 well plate format using LB  
468 media in 100  $\mu$ L well volumes. Cultures were grown at 37 °C with shaking at 250 r.p.m.  
469 and OD<sub>600</sub> was read on a Biotek plate reader after 20 hours. *P* values were determined  
470 using a two-tailed Student's t-test in GraphPad Prism 7.0.

471

## 472 **Acknowledgments**

473 We gratefully acknowledge Pinakin Sukthankar, Rik Dhar, Dwight Deay and Heather  
474 Shinogle for helpful discussions and feedback, Mark Richter for the use of his  
475 fluorometer, Rajeev Misra for the pTrc vector containing the TolC gene, Daniel Müller for  
476 the BL21(DE3)Omp8 strain, Chamani Perera for peptide synthesis, Karen Marom for  
477 editorial guidance, and Batika Saxena (Grafika Labs) for artistic assistance. We also  
478 gratefully acknowledge support from NIH award DP2GM128201 to JS GS, the Gordon  
479 and Betty Moore Inventor Fellowship to JS GS, NIH award R21-GM128022-02 to JSB,  
480 and NIGMS award P20GM113117, P20GM103638.

## 481 **References**

- 482 1. Alexander C & Rietschel ET (2001) Invited review: Bacterial lipopolysaccharides  
483 and innate immunity. *Journal of Endotoxin Research* 7(3):167-202.
- 484 2. Kamio Y & Nikaido H (1976) Outer membrane of Salmonella typhimurium:  
485 accessibility of phospholipid head groups to phospholipase c and cyanogen  
486 bromide activated dextran in the external medium. *Biochemistry* 15(12):2561-  
487 2570.
- 488 3. Freeman JTC & Wimley WC (2012) TMBB-DB: a transmembrane  $\beta$ -barrel  
489 proteome database. *Bioinformatics* 28(19):2425-2430.
- 490 4. Storek KM, *et al.* (2018) Monoclonal antibody targeting the beta-barrel assembly  
491 machine of Escherichia coli is bactericidal. *Proceedings of the National Academy  
492 of Sciences of the United States of America* 115(14):3692-3697.

- 493 5. Gilardi A, *et al.* (2017) Biophysical characterization of E. coli TolC interaction with  
494 the known blocker hexaamminecobalt. *Biochimica et biophysica acta* 1861(11 Pt  
495 A):2702-2709.
- 496 6. Wang Z, *et al.* (2017) An allosteric transport mechanism for the AcrAB-TolC  
497 multidrug efflux pump. *eLife* 6.
- 498 7. Yamaguchi A, Nakashima R, & Sakurai K (2015) Structural basis of RND-type  
499 multidrug exporters. *Frontiers in microbiology* 6:327.
- 500 8. Ramaswamy VK, Vargiu AV, Mallocci G, Dreier J, & Ruggerone P (2017)  
501 Molecular Rationale behind the Differential Substrate Specificity of Bacterial RND  
502 Multi-Drug Transporters. *Scientific reports* 7(1):8075.
- 503 9. Anes J, McCusker MP, Fanning S, & Martins M (2015) The ins and outs of RND  
504 efflux pumps in Escherichia coli. *Frontiers in microbiology* 6:587.
- 505 10. Liu A, *et al.* (2010) Antibiotic Sensitivity Profiles Determined with an Escherichia  
506 coli Gene Knockout Collection: Generating an Antibiotic Bar Code. *Antimicrobial  
507 Agents and Chemotherapy* 54(4):1393-1403.
- 508 11. Swick MC, Morgan-Linnell SK, Carlson KM, & Zechiedrich L (2011) Expression  
509 of Multidrug Efflux Pump Genes *acrAB-tolC*, *mdfA*, and *norE* in Escherichia coli  
510 Clinical Isolates as a Function of Fluoroquinolone and Multidrug Resistance.  
511 *Antimicrobial Agents and Chemotherapy* 55(2):921-924.
- 512 12. Roope LSJ, *et al.* (2019) The challenge of antimicrobial resistance: What  
513 economics can contribute. *Science* 364(6435).
- 514 13. Ventola CL (2015) The antibiotic resistance crisis: part 1: causes and threats. *P T*  
515 40(4):277-283.
- 516 14. Kurisu G, *et al.* (2003) The structure of BtuB with bound colicin E3 R-domain  
517 implies a translocon. *Nat Struct Biol* 10(11):948-954.
- 518 15. Buchanan SK, *et al.* (2007) Structure of colicin I receptor bound to the R-domain  
519 of colicin Ia: implications for protein import. *EMBO J* 26(10):2594-2604.
- 520 16. Cascales E, *et al.* (2007) Colicin Biology. *Microbiology and Molecular Biology  
521 Reviews* 71(1):158-229.
- 522 17. Benedetti H, *et al.* (1991) Individual domains of colicins confer specificity in  
523 colicin uptake, in pore-properties and in immunity requirement. *Journal of  
524 molecular biology* 217(3):429-439.
- 525 18. Zakharov SD, Wang XS, & Cramer WA (2016) The Colicin E1 TolC-Binding  
526 Conformer: Pillar or Pore Function of TolC in Colicin Import? *Biochemistry*  
527 55(36):5084-5094.
- 528 19. Zakharov SD, *et al.* (2004) Colicin occlusion of OmpF and TolC channels: outer  
529 membrane translocons for colicin import. *Biophysical journal* 87(6):3901-3911.
- 530 20. Jakes KS (2017) The Colicin E1 TolC Box: Identification of a Domain Required  
531 for Colicin E1 Cytotoxicity and TolC Binding. *Journal of bacteriology* 199(1).
- 532 21. Housden NG, *et al.* (2010) Directed epitope delivery across the Escherichia coli  
533 outer membrane through the porin OmpF. *Proceedings of the National Academy  
534 of Sciences of the United States of America* 107(50):21412-21417.
- 535 22. Yamashita E, Zhalnina MV, Zakharov SD, Sharma O, & Cramer WA (2008)  
536 Crystal structures of the OmpF porin: function in a colicin translocon. *EMBO J*  
537 27(15):2171-2180.
- 538 23. Zakharov SD, Wang XS, & Cramer WA (2016) The Colicin E1 TolC-Binding  
539 Conformer: Pillar or Pore Function of TolC in Colicin Import? *Biochemistry*  
540 55(36):5084-5094.
- 541 24. Besingi RN & Clark PL (2015) Extracellular protease digestion to evaluate  
542 membrane protein cell surface localization. *Nature protocols* 10(12):2074-2080.

- 543 25. Rassam P, *et al.* (2015) Supramolecular assemblies underpin turnover of outer  
544 membrane proteins in bacteria. *Nature* 523(7560):333-336.
- 545 26. Chavent M, *et al.* (2018) How nanoscale protein interactions determine the  
546 mesoscale dynamic organisation of bacterial outer membrane proteins. *Nat*  
547 *Commun* 9(1):2846.
- 548 27. White P, *et al.* (2017) Exploitation of an iron transporter for bacterial protein  
549 antibiotic import. *Proceedings of the National Academy of Sciences of the United*  
550 *States of America* 114(45):12051-12056.
- 551 28. Kleanthous C, Rassam P, & Baumann CG (2015) Protein-protein interactions  
552 and the spatiotemporal dynamics of bacterial outer membrane proteins. *Curr*  
553 *Opin Struct Biol* 35:109-115.
- 554 29. Bohnert JA, Schuster S, Szymaniak-Vits M, & Kern WV (2011) Determination of  
555 real-time efflux phenotypes in *Escherichia coli* AcrB binding pocket phenylalanine  
556 mutants using a 1,2'-dinaphthylamine efflux assay. *PLoS one* 6(6):e21196.
- 557 30. Bohnert JA, Karamian B, & Nikaido H (2010) Optimized Nile Red efflux assay of  
558 AcrAB-TolC multidrug efflux system shows competition between substrates.  
559 *Antimicrob Agents Chemother* 54(9):3770-3775.
- 560 31. Seeger MA, *et al.* (2008) Engineered disulfide bonds support the functional  
561 rotation mechanism of multidrug efflux pump AcrB. *Nat Struct Mol Biol* 15(2):199-  
562 205.
- 563 32. Iyer R, Ferrari A, Rijnbrand R, & Erwin AL (2015) A fluorescent microplate assay  
564 quantifies bacterial efflux and demonstrates two distinct compound binding sites  
565 in AcrB. *Antimicrob Agents Chemother* 59(4):2388-2397.
- 566 33. Misra R, Morrison KD, Cho HJ, & Khuu T (2015) Importance of Real-Time  
567 Assays To Distinguish Multidrug Efflux Pump-Inhibiting and Outer Membrane-  
568 Destabilizing Activities in *Escherichia coli*. *Journal of bacteriology* 197(15):2479-  
569 2488.
- 570 34. Cramer WA, Sharma O, & Zakharov SD (2018) On mechanisms of colicin import:  
571 the outer membrane quandary. *Biochem J* 475(23):3903-3915.
- 572 35. Mohanty AK, Bishop CM, Bishop TC, Wimley WC, & Wiener MC (2003)  
573 Enzymatic E-colicins bind to their target receptor BtuB by presentation of a small  
574 binding epitope on a coiled-coil scaffold. *The Journal of biological chemistry*  
575 278(42):40953-40958.
- 576 36. Taylor R, Burgner JW, Clifton J, & Cramer WA (1998) Purification and  
577 characterization of monomeric *Escherichia coli* vitamin B12 receptor with high  
578 affinity for colicin E3. *The Journal of biological chemistry* 273(47):31113-31118.
- 579 37. Spector J, *et al.* (2010) Mobility of BtuB and OmpF in the *Escherichia coli* outer  
580 membrane: implications for dynamic formation of a translocon complex.  
581 *Biophysical journal* 99(12):3880-3886.
- 582 38. Tikhonova EB & Zgurskaya HI (2004) AcrA, AcrB, and TolC of *Escherichia coli*  
583 Form a Stable Intermembrane Multidrug Efflux Complex. *The Journal of*  
584 *biological chemistry* 279(31):32116-32124.
- 585 39. Franklin MW, *et al.* (2018) Efflux Pumps Represent Possible Evolutionary  
586 Convergence onto the beta-Barrel Fold. *Structure* 26(9):1266-1274.e1262.
- 587 40. Kleanthous C (2010) Swimming against the tide: progress and challenges in our  
588 understanding of colicin translocation. *Nat Rev Microbiol* 8(12):843-848.
- 589 41. Tuson HH & Biteen JS (2015) Unveiling the inner workings of live bacteria using  
590 super-resolution microscopy. *Anal Chem* 87(1):42-63.

593

594 Supplemental Data  
595

596

597

598

599

600

601

602

603

604

605

606

607

608

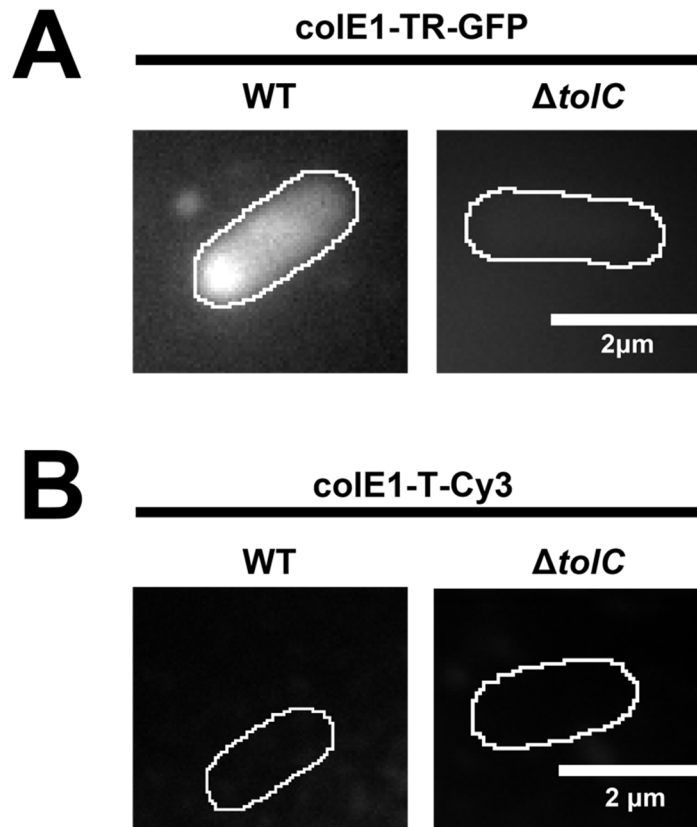

**Figure S1: Single-molecule microscopy.** Fluorescence images of colE1-TR-GFP (A) and Cy3-labeled colE1-T (B) overlaid on outlines of living *E. coli* cells from phase-contrast microscopy for WT and  $\Delta tolC$ . Scale bar: 2  $\mu$ m. ColE1-TR-GFP forms similar puncta as Cy3-labeled ColE1-TR. No binding of Cy3-labeled colE1-T to WT or  $\Delta tolC$  cells was detected.

609

610

611

612

613

614

615 **Movie S1 Caption:**

616 Colicin E1 TR localizes on, and remains bound to, the extracellular surface of *E. coli*.  
617 Fluorescence movie of Cy3-labeled colE1-TR on living WT *E. coli* overlaid on outline of  
618 the *E. coli* cell from phase-contrast microscopy. Continuous imaging at 25 frames per  
619 second. Scale bar: 2  $\mu\text{m}$ .  
620

621



622 **Table S1**

623 Minimum inhibitor concentrations of antimicrobials in the presence of colE1-TR

|                                                           | Erythromycin<br>( $\mu\text{g/mL}$ ) | Ciprofloxacin<br>( $\text{ng/mL}$ ) | Kanamycin<br>( $\mu\text{g/mL}$ ) | Benzalkonium<br>Chloride ( $\mu\text{g/mL}$ ) |
|-----------------------------------------------------------|--------------------------------------|-------------------------------------|-----------------------------------|-----------------------------------------------|
| WT                                                        | 255.0 $\pm$ 11.7                     | 39.4 $\pm$ 2.7                      | 14.0 $\pm$ 2.3                    | 42.2 $\pm$ 4.0                                |
| $\Delta\text{tolC}$                                       | 2.5 $\pm$ 0.1                        | 4.0 $\pm$ 0.3                       | NA                                | 3.3 $\pm$ 0.3                                 |
| WT + 1 $\mu\text{M}$<br>colE1-TR                          | 298.7 $\pm$ 13.6                     | 53.5 $\pm$ 7.2                      | 15.7 $\pm$ 3.3                    | 48.49 $\pm$ 7.5                               |
| WT + 10 $\mu\text{M}$<br>colE1-TR                         | 271.7 $\pm$ 22.9                     | 50.2 $\pm$ 18.0                     | 15.1 $\pm$ 5.2                    | 48.3 $\pm$ 0.9                                |
| WT + 25 $\mu\text{M}$<br>colE1-TR                         | 162.6 $\pm$ 5.8                      | 42.3 $\pm$ 7.3                      | 5.4 $\pm$ 1.2                     | 38.6 $\pm$ 5.5                                |
| WT + 50 $\mu\text{M}$<br>colE1-TR                         | 167.0 $\pm$ 15.0                     | 34.6 $\pm$ 9.2                      | 19.1 $\pm$ 3.0                    | 45.5 $\pm$ 0.3                                |
| WT + 100<br>$\mu\text{M}$ colE1-<br>TR                    | 111.8 $\pm$ 27.6                     | 25.0 $\pm$ 4.7                      | 6.8 $\pm$ 2.2                     | 20.7 $\pm$ 2.8                                |
| fold change<br>in MIC at<br>100 $\mu\text{M}$<br>colE1-TR | 2.2x                                 | 1.6x                                | 2.0x                              | 2.0x                                          |

624  $\pm$  denote Standard Error of the Mean (SEM)

625

## 626 **Supplementary Methods**

### 627 Expression and Purification

#### 628 *Colicin E1 constructs*

629 The gene for WT colE1-TR was synthesized as a double-stranded linear  
630 fragment (Integrated DNA Technologies) and cloned into pET303 using megaprimer  
631 restriction free cloning. Inverse PCR was used to delete the R domain and produce  
632 colicin E1-T. The gene for colicin E1-TR-GFP was produced by inserting GFP upstream  
633 of colE-TR, using Gibson assembly. Plasmids were transformed into *E. coli* BL21(DE3)  
634 cells and plated on LB + agar + 100 µg/mL carbenicillin. Single colonies were inoculated  
635 into 50 mL LB broth with 100 µg/mL carbenicillin and grown overnight at 37 °C with  
636 shaking at 250 r.p.m. Proteins were expressed by inoculating 1L of TB supplemented  
637 with 0.4% glycerol, 10 mM MgCl<sub>2</sub> and 100 µg/mL carbenicillin with 20 mL of the  
638 overnight culture; the culture was grown at 37 °C to an OD<sub>600</sub> of 2.0 and induced with 1  
639 mM IPTG. Expression cultures were grown at 15 °C for 24 hours and harvested at  
640 4,000g for 30 minutes at 4 °C. Cell pellets were resuspended in (3 mL/g of cell pellet)  
641 lysis buffer (TBS, 5 mM MgCl<sub>2</sub>, 10 mM imidazole, 1mM PMSF, 10 µg/mL DNase, 0.25  
642 mg/mL lysozyme) and lysed via sonication (2 minutes, 2s on, 8s off, 40% amplitude,  
643 QSonica Q500 with 12.7 mm probe) in an ice bath. Lysates were centrifuged at 4,000g  
644 for 10 minutes to remove un-lysed cells and debris. The supernatant was centrifuged  
645 again at 20,000 r.p.m. in a Beckman Coulter J2-21 for 1 hour at 4 °C. Clarified lysates  
646 were applied to a 5 mL HisTrap FF column and purified using an ÄKTA FPLC system  
647 with a 20 column volume wash step with binding buffer (TBS, 25 mM imidazole) and  
648 eluted using a linear gradient from 0-50% elution buffer (TBS, 500 mM imidazole) in 10  
649 column volumes. Proteins were concentrated in Amicon centrifugal filters with molecular  
650 weight cutoffs of 10K and 30K for colicin E1-T and for colicin E1-TR, respectively.

651 Concentrated proteins were loaded onto a HiLoad Superdex 16/60 200 pg gel filtration  
652 column and eluted into phosphate buffered saline (PBS) pH 7.4.

653

654 *ToIC*

655 The gene for full-length ToIC (a generous gift from R. Misra) was cloned into  
656 pTrcHis with a C-terminal 6x histidine tag. Plasmids were transformed into  
657 BL21(DE3)Omp8 and plated on LB + agar + 100 µg/mL carbenicillin. A single colony  
658 was picked and grown in LB-Lennox at 30 °C with shaking at 150 r.p.m. overnight. In the  
659 morning, 1L of LB-Lennox was inoculated with 20 mL of the overnight culture and grown  
660 at 30 °C with shaking at 150 r.p.m. until the culture reached an OD<sub>600</sub> of 0.6, at which  
661 point protein expression was induced with 1mM IPTG for an additional 4 hours then  
662 harvested at 4,000g for 30 minutes at 4°C. Cell pellets were resuspended in 30 mL of  
663 Lysis buffer (TBS, 5 mM MgCl<sub>2</sub>, 5 µg/mL DNase, 1mM PMSF) and lysed via sonication  
664 (2 minutes, 2s on, 8s off, 40% amplitude, QSonica Q500 with 12.7 mm probe) in an ice  
665 bath. Cell lysates were centrifuged at 4,000 g for 30 minutes at 4 °C to remove un-lysed  
666 cells and inclusion bodies. Total membrane fractions were harvested by centrifuging at  
667 20,000 r.p.m. in a Beckman Coulter J2-21 for 1 hour at 4 °C. The resulting membrane  
668 pellet was resuspended in 20 mM Tris, 400 NaCl, 1% n-dodecyl-β-D-maltoside with mild  
669 stirring at 4 °C overnight to extract the protein. The solubilized membrane fraction was  
670 centrifuged at 20,000 r.p.m. in a Beckman Coulter J2-21 for 1 hour at 4 °C. The  
671 supernatant was filtered through 0.22 µm and applied to a 1 mL HisTrap FF column and  
672 purified using an ÄKTA FPLC system with a 20 column volume wash step with binding  
673 buffer (20 mM Tris, 400 NaCl, 0.05% n-dodecyl-β-D-maltoside, 25 mM imidazole) and  
674 eluted using a linear gradient from 0-100% elution buffer (20 mM Tris, 400 NaCl, 0.05%  
675 n-dodecyl-β-D-maltoside, 500 mM imidazole) in 10 column volumes. ToIC containing  
676 fractions were pooled and concentrated to 2 mL and applied onto a HiLoad 16/60

677 Superdex 200 pg column and eluted with 1.5 column volumes in 20 mM Tris, 400 NaCl,  
678 0.05% n-dodecyl- $\beta$ -D-maltoside.

679

### 680 Extracellular Protease Digestion

681 Protein localization after exogenous protein addition to whole cells was  
682 determined as previously described (1). BW25113 cells were grown to an OD<sub>600</sub> of ~0.6.  
683 Cells were harvested by centrifugation at 4,000g for 5 minutes and resuspended in 1x  
684 PBS. Cells were incubated with 10  $\mu$ M protein and incubated for 1 hour at 37 °C with  
685 rocking. After incubation, cells were harvested by centrifugation and washed 2x with  
686 PBS to remove any unbound protein. Cell pellets were resuspended in 5 mL of protease  
687 buffer (50 mM Tris pH=8, 7.5 mM CaCl<sub>2</sub>) and OD<sub>600</sub> normalized. Cultures were split into  
688 two samples for trypsin digestion: 1) intact cells 2) lysed cells. For the lysed cell sample,  
689 0.25 mg/mL lysozyme was added, and the sample was incubated at room temperature  
690 for 15 minutes. The cells were lysed by 5x freeze-thaw cycles by submerging in liquid  
691 nitrogen followed by thawing. For each cell condition (lysed and intact) the sample was  
692 further split into 6 aliquots. Aliquots were incubated with a final concentration of 0, 5, 20  
693  $\mu$ g/mL trypsin. The reaction was incubated for 30 minutes with intermittent gentle flicking  
694 of the tubes. After 30 minutes 100 mM PMSF was added to stop the digestion reaction.  
695 Samples were snap frozen in liquid nitrogen and stored at -20 °C until western blot  
696 analysis.

697

### 698 Single-Molecule Microscopy

699 Cysteine mutants for microscopy were purified as described above with the  
700 addition of 1 mM TCEP in all buffers to prevent covalent dimer formation. Because of the  
701 use of the fluorophore, all subsequent steps were performed with limited exposure to  
702 light and in amber tubes. Cyanine3 (Cy3) maleimide (Lumiprobe) was reconstituted in

703 DMSO. Fluorophore labeling was achieved by mixing a 20-fold molar excess of Cy3  
704 maleimide to protein and incubating overnight at 4 °C. Free dye was removed by gel  
705 filtration on a Sephadex NAP-10 G-25 column. The sample was simultaneously buffer-  
706 exchanged into storage buffer (PBS pH 7.4, 1 mM DTT, 1 mM EDTA). The degree of  
707 labeling was determined spectrophotometrically from the concentrations of the dye and  
708 protein solutions using their respective extinction coefficients,  $\epsilon$ , as described by their  
709 manufacturers or for the proteins as estimated by ExPASy ProtParam (Cy3  $\epsilon_{548\text{nm}} =$   
710  $162,000 \text{ L mol}^{-1} \text{ cm}^{-1}$ ; colE1-T-E192C  $\epsilon_{280\text{nm}} = 9,970 \text{ L mol}^{-1} \text{ cm}^{-1}$ ; colE1-TR-E366C  $\epsilon_{280\text{nm}}$   
711  $= 14,440 \text{ L mol}^{-1} \text{ cm}^{-1}$ ). Labeling efficiencies were ~75% and ~85% for colE1-T-E192C  
712 and colE1-TR-E366C, respectively. Protein concentrations were adjusted according to  
713 the percentage of labeled protein.

714 Cultures of *E. coli* (BW25113 or  $\Delta\text{tolC}$ ) were grown in LB medium at 37 °C with  
715 shaking (180 r.p.m.) overnight, then transferred to MOPS minimal medium (Teknova)  
716 with 0.2% glycerol and 1.32 mM  $\text{K}_2\text{HPO}_4$ , and grown at 37 °C for 13 h. A sample was  
717 transferred to MOPS medium and grown to turbidity at 37 °C overnight. A 1-mL aliquot of  
718 culture was centrifuged for 2 min at 4850g to pellet the cells. The pellet was washed in 1  
719 mL MOPS and centrifuged a second time. The supernatant was then removed, and the  
720 cell pellet was resuspended in 500  $\mu\text{L}$  MOPS. A 1.0  $\mu\text{L}$  droplet of concentrated cells was  
721 placed onto a glass slide. Then, a 1.0  $\mu\text{L}$  droplet of 1  $\mu\text{g}/\text{mL}$  colicin E1 protein construct  
722 stock was added to the cells. The droplet was covered by an agarose pad (1% agarose  
723 in MOPS media) and a second coverslip.

724 Samples were imaged at room temperature using wide-field epifluorescence  
725 microscopy with sensitivity to detect single dye molecules as described previously (2).  
726 Briefly, fluorescence was excited by a 561-nm laser (Coherent Sapphire 560-50) for Cy3  
727 or a 488-nm laser (Coherent Sapphire 488-50) for GFP. The lasers were operated at low  
728 power densities (1 – 2  $\text{W}/\text{cm}^2$ ), and fluorescence was imaged with an Olympus IX71

729 inverted microscope with a 100x, 1.40-NA oil-immersion objective and appropriate  
730 excitation, emission, and dichroic filters. A Photometrics Evolve electron multiplying  
731 charge-coupled device (EMCCD) camera with > 90% quantum efficiency captured the  
732 images at a rate of 20 frames per second. Each detector pixel corresponds to a 49 nm ×  
733 49 nm area of the sample.

734

### 735 Real-time Efflux

736 Real-time efflux activity in the presence of colE1-TR was determined as  
737 previously described with some modifications (3,4). A single colony of *E. coli* BW25113  
738 was inoculated into 10 mL of LB and incubated overnight at 37 °C. The next day, 50 mL  
739 of LB was inoculated with 1 mL of the overnight culture and grown to OD<sub>600</sub> of ~0.8.  
740 Cells were pelleted at 3,500g for 5 minutes. Cells were resuspended to OD<sub>600</sub> 1.5 in cold  
741 PBS with and without 10-100 μM colicin proteins and incubated for 15 minutes on ice. To  
742 decouple proton motive force and turn off efflux, 100μM carbonyl cyanide m-  
743 chlorophenyl hydrazone (CCCP) was added. After an additional 15 minutes the efflux  
744 dye NNN was added to the cells to 10 μM. The cells were incubated at 25 °C with  
745 shaking at 140 r.p.m. for 2 hours. Cells were harvested at 3,500g for 5 minutes and  
746 washed once in 20 mM potassium phosphate buffer pH 7 with 1mM MgCl<sub>2</sub>. Optical  
747 densities were adjusted to OD<sub>600</sub> 1.0 and placed on ice. Then, 2 mL of the cell  
748 suspension was loaded into a quartz cuvette (Agilent Technologies). Fluorescence was  
749 measured with an Agilent Cary Eclipse fluorescence spectrophotometer with slit widths  
750 at 5 and 10 nm for excitation wavelength of 370 nm and emission wavelength of 415 nm.  
751 Fluorescence measurements were taken every 1 second. After 100 seconds, 50 mM  
752 glucose was added to re-energize the cells and initiate efflux, and fluorescence data  
753 were collected for an additional 600 seconds.

754

## 755 Modeling BtuB and TolC on a grid

756 To select the configurations where every pair of BtuB and TolC proteins interact,  
757 we transformed each of the 24-choose-12 grid configurations (equation 1) into a bipartite  
758 graph representation where two vertices are connected by an edge if they are neighbors  
759 in the grid. Neighbors are defined as if a BtuB is one of the 8 immediate neighbors of a  
760 TolC. We applied the Hopcroft-Karp algorithm (5) for finding a maximum cardinality  
761 matching on the graph. If a matching was found this was counted as one successful  
762 configuration.

763 The number of successful configurations was 788,736. Removing the three  
764 symmetries of the rectangle (vertical and horizontal plane flips and 180-degree rotation),  
765 the number is  $788,736/3 = 262,912$ . In neither the 24 choose 12 set nor the neighboring  
766 set if a configuration is the same as its mirror image (vertical or horizontal), these are not  
767 counted as separate instances.

768

769 equation 1.

770

$$771 \quad \frac{24!}{12!(24-12)!} = 2,704,156$$

772

773

## 774 **Supplementary References**

775

- 776 1. Besingi RN & Clark PL (2015) Extracellular protease digestion to evaluate  
777 membrane protein cell surface localization. *Nature protocols* 10(12):2074-2080.
- 778 2. Tuson HH & Biteen JS (2015) Unveiling the inner workings of live bacteria using  
779 super-resolution microscopy. *Anal Chem* 87(1):42-63.
- 780 3. Bohnert JA, Karamian B, & Nikaido H (2010) Optimized Nile Red efflux assay of  
781 AcrAB-TolC multidrug efflux system shows competition between substrates.  
782 *Antimicrob Agents Chemother* 54(9):3770-3775.

- 783 4. Bohnert JA, Schuster S, Szymaniak-Vits M, & Kern WV (2011) Determination of  
784 real-time efflux phenotypes in Escherichia coli AcrB binding pocket phenylalanine  
785 mutants using a 1,2'-dinaphthylamine efflux assay. *PloS one* 6(6):e21196.  
786 5. Hopcroft JE & Karp RM (1973) An  $n^{5/2}$  Algorithm for Maximum Matchings in  
787 Bipartite Graphs. *SIAM Journal on Computing* 2(4):225-231.  
788
